# Supplementary material
Source: PubMed Central journal article supplement (PMC2743260)

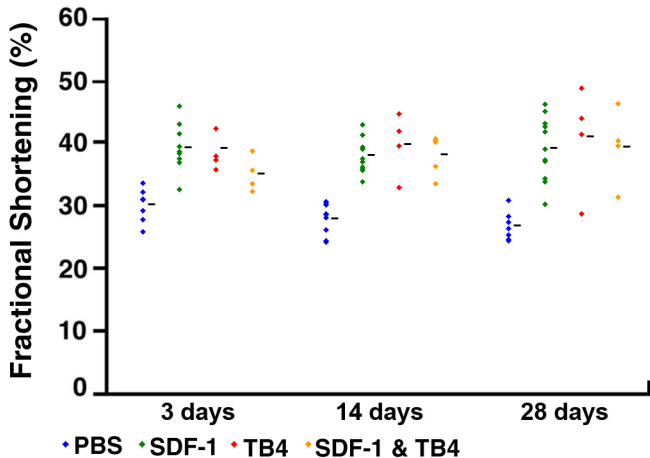

Supplement: NIHMS66325-supplement-Figure_S1.pdf [file NIHMS66325-supplement-Figure_S1.pdf]
